# Supplementary material for: RNAseq Analysis of FABP4 Knockout Mouse Hippocampal Transcriptome Suggests a Role for WNT/β-Catenin in Preventing Obesity-Induced Cognitive Impairment
Source: MDPI journal article supplement (doi:10.3390/ijms24043381), 2023-02-08
Supplement: s1 [file s1]

## Supplementary Materials

### S1. Results

#### S1.1. Differentially Expressed Pathways in HFD-Fed AKO Compared to HFD-fed WT Mice

Using Reactome molecular pathway analysis, we determined the differentially expressed pathways in HFD-fed AKO mice compared to HFD-fed WT mice ( $FDR \leq 0.01$ ). There were 39 pathways in total. 9 of these pathways were unrelated to ribosomal protein subunits and were examined further for transcript function (Supplemental Table S1). These 9 differentially expressed pathways were related to metabolism. Transcripts associated with the electron transport chain [1–8] and citric acid cycle [9–12] were downregulated and upregulated, respectively. Transcripts associated with Golgi transport were upregulated [13–45]. Transcripts relating to mRNA polyadenylation were upregulated [46–51]. Transcripts relating to Wnt/ $\beta$ -Catenin signaling were upregulated [52–57].

**Supplemental Table S1.** Differentially Expressed Pathways in HFD-fed AKO Compared to HFD-fed WT Mice. Pathways with  $FDR \leq 0.01$  are displayed. Pathway name, stable identifier, log fold change ( $\log_2$ ), and false discovery rate for each pathway are displayed. Within each pathway, gene ID, Ensembl ID, gene description, log fold change ( $\log_2$ ),  $\log_{10}$  adjusted  $p$ -value, and relevant known function are displayed.

| Reactome Pathway                                                                                     | Gene Symbol                                                                                                          | Ensembl ID                                                                                                                                                                                                     | Gene Description                                                                                                                                                                                                                                                                                                             | Log FC                                          | $p_{adj}$                                                                                                                                                                   | Known Function                                                                                                        |
|------------------------------------------------------------------------------------------------------|----------------------------------------------------------------------------------------------------------------------|----------------------------------------------------------------------------------------------------------------------------------------------------------------------------------------------------------------|------------------------------------------------------------------------------------------------------------------------------------------------------------------------------------------------------------------------------------------------------------------------------------------------------------------------------|-------------------------------------------------|-----------------------------------------------------------------------------------------------------------------------------------------------------------------------------|-----------------------------------------------------------------------------------------------------------------------|
| Formation of ATP by chemiosmotic coupling (R-HSA-163210)<br>LFC: -0.13<br>FDR: $2.40 \times 10^{-4}$ | <i>Atp5j2</i><br><i>Atp5h</i>                                                                                        | ENSMUST0000161741<br>ENSMUST0000043931                                                                                                                                                                         | ATP synthase, H+ transporting, mitochondrial F0 complex, subunit F2<br>ATP synthase, H+ transporting, mitochondrial F0 complex, subunit D                                                                                                                                                                                    | -0.27 - 0.26                                    | $1.82 \times 10^{-2}$<br>$3.98 \times 10^{-2}$                                                                                                                              | Inhibition is neuroprotective in aging and AD [58]                                                                    |
| Cristae formation (R-HSA-8949613)<br>LFC: -0.09<br>FDR: $6.07 \times 10^{-3}$                        | <i>Atp5j2</i><br><i>Atp5h</i>                                                                                        | ENSMUST0000161741<br>ENSMUST0000043931                                                                                                                                                                         | ATP synthase, H+ transporting, mitochondrial F0 complex, subunit F2<br>ATP synthase, H+ transporting, mitochondrial F0 complex, subunit D                                                                                                                                                                                    | -0.27 - 0.26                                    | $1.82 \times 10^{-2}$<br>$3.98 \times 10^{-2}$                                                                                                                              | Inhibition is neuroprotective in aging and AD [58]                                                                    |
|                                                                                                      | <i>Hspa9</i>                                                                                                         | ENSMUST0000025217                                                                                                                                                                                              | Heat shock protein 9                                                                                                                                                                                                                                                                                                         | 0.28                                            | $1.69 \times 10^{-2}$                                                                                                                                                       | Oxidative stress sensor [59], Downregulated in AD brain [60]                                                          |
|                                                                                                      | <i>Samm50</i>                                                                                                        | ENSMUST0000023071                                                                                                                                                                                              | SAMM50 sorting and assembly machinery component                                                                                                                                                                                                                                                                              | 0.37                                            | $1.12 \times 10^{-2}$                                                                                                                                                       | Negative regulator of mitochondrial fragmentation [61]                                                                |
| Complex I biogenesis (R-HSA-6799198)<br>LFC: -0.04<br>FDR: $3.00 \times 10^{-4}$                     | <i>Ndufb2</i><br><i>Ndufb4</i><br><i>Ndufb11</i><br><i>Ndufs8</i><br><i>Ndufa4</i><br><i>Ndufb9</i><br><i>Ndufa2</i> | ENSMUST0000119379<br>ENSMUST0000119379<br>ENSMUST0000119379<br>ENSMUST0000023514<br>ENSMUST0000116621<br>ENSMUST0000116621<br>ENSMUST0000237341<br>ENSMUST0000204978<br>ENSMUST0000022980<br>ENSMUST0000014438 | NADH:ubiquinone oxidoreductase subunit B2<br>NADH:ubiquinone oxidoreductase subunit B4<br>NADH:ubiquinone oxidoreductase subunit B11<br>NADH:ubiquinone oxidoreductase core subunit S8<br>Ndufa4, mitochondrial complex associated<br>NADH:ubiquinone oxidoreductase subunit B9<br>NADH:ubiquinone oxidoreductase subunit A2 | -0.32 - 0.29 - 0.28 - 0.27 - 0.25 - 0.23 - 0.20 | $2.39 \times 10^{-2}$<br>$2.89 \times 10^{-2}$<br>$3.32 \times 10^{-2}$<br>$4.63 \times 10^{-2}$<br>$4.69 \times 10^{-2}$<br>$4.16 \times 10^{-2}$<br>$4.83 \times 10^{-2}$ | Partial inhibition of Complex I leads to reduced oxidative stress and increased long-term potentiation in AD mice [1] |

|                                                                                                                                                                               |                                                                                                                      |                                                                                                                                                 |                                                                                                                                                                                                                                                                                                                              |                                                                   |                                                                                                                                                                             |                                                                                                                       |
|-------------------------------------------------------------------------------------------------------------------------------------------------------------------------------|----------------------------------------------------------------------------------------------------------------------|-------------------------------------------------------------------------------------------------------------------------------------------------|------------------------------------------------------------------------------------------------------------------------------------------------------------------------------------------------------------------------------------------------------------------------------------------------------------------------------|-------------------------------------------------------------------|-----------------------------------------------------------------------------------------------------------------------------------------------------------------------------|-----------------------------------------------------------------------------------------------------------------------|
|                                                                                                                                                                               | <i>mt-Nd3</i>                                                                                                        | ENSMUST0000082411                                                                                                                               | Mitochondrially encoded NADH dehydrogenase 3                                                                                                                                                                                                                                                                                 | -0.23                                                             | $4.06 \times 10^{-2}$                                                                                                                                                       | Partial inhibition of Complex I leads to reduced oxidative stress and increased long-term potentiation in AD mice [1] |
|                                                                                                                                                                               | <i>Acad9</i>                                                                                                         | ENSMUST0000011492                                                                                                                               | Acyl-Coenzyme A dehydrogenase family, member 9                                                                                                                                                                                                                                                                               | 0.29                                                              | $2.59 \times 10^{-2}$                                                                                                                                                       | Role in fatty acid oxidation, downregulation associated with neurological disease [2]                                 |
|                                                                                                                                                                               | <i>Timmdc1</i>                                                                                                       | ENSMUST0000002925                                                                                                                               | Translocase of inner mitochondrial membrane domain containing 1                                                                                                                                                                                                                                                              | 0.36                                                              | $9.17 \times 10^{-3}$                                                                                                                                                       | Loss is associated with axonal neuropathy and cognitive decline [3]                                                   |
| Respiratory electron transport, ATP synthesis by chemiosmotic coupling, and heat production by uncoupling proteins (R-HSA-163200)<br>LFC: -0.04<br>FDR: $8.45 \times 10^{-7}$ | <i>Ndufb2</i><br><i>Ndufb4</i><br><i>Ndufb11</i><br><i>Ndufs8</i><br><i>Ndufa4</i><br><i>Ndufb9</i><br><i>Ndufa2</i> | ENSMUST0000119379<br>ENSMUST0000023514<br>ENSMUST0000116621<br>ENSMUST0000237341<br>ENSMUST0000204978<br>ENSMUST0000022980<br>ENSMUST0000014438 | NADH:ubiquinone oxidoreductase subunit B2<br>NADH:ubiquinone oxidoreductase subunit B4<br>NADH:ubiquinone oxidoreductase subunit B11<br>NADH:ubiquinone oxidoreductase core subunit S8<br>Ndufa4, mitochondrial complex associated<br>NADH:ubiquinone oxidoreductase subunit B9<br>NADH:ubiquinone oxidoreductase subunit A2 | -0.32 -<br>0.29 -<br>0.28 -<br>0.27 -<br>0.25 -<br>0.23 -<br>0.20 | $2.39 \times 10^{-2}$<br>$2.89 \times 10^{-2}$<br>$3.32 \times 10^{-2}$<br>$4.63 \times 10^{-2}$<br>$4.69 \times 10^{-2}$<br>$4.16 \times 10^{-2}$<br>$4.83 \times 10^{-2}$ | Partial inhibition of Complex I leads to reduced oxidative stress and increased long-term potentiation in AD mice [1] |
|                                                                                                                                                                               | <i>Cox7b</i>                                                                                                         | ENSMUST0000033582                                                                                                                               | Cytochrome c oxidase subunit 7B                                                                                                                                                                                                                                                                                              | -0.31                                                             | $1.13 \times 10^{-2}$                                                                                                                                                       | Loss leads to decrease in oxidative stress and amyloid formation in AD mice [4]                                       |
|                                                                                                                                                                               | <i>Uqcrh</i>                                                                                                         | ENSMUST0000078676                                                                                                                               | Ubiquinol-cytochrome c reductase hinge protein                                                                                                                                                                                                                                                                               | -0.29                                                             | $3.04 \times 10^{-2}$                                                                                                                                                       | Positive regulator of apoptosis via cytochrome c release [5]                                                          |
|                                                                                                                                                                               | <i>Atp5j2</i><br><i>Atp5h</i>                                                                                        | ENSMUST0000161741<br>ENSMUST0000043931                                                                                                          | ATP synthase, H <sup>+</sup> transporting, mitochondrial F0 complex, subunit F2<br>ATP synthase, H <sup>+</sup> transporting, mitochondrial F0 complex, subunit D                                                                                                                                                            | -0.27 -<br>0.26                                                   | $1.82 \times 10^{-2}$<br>$3.98 \times 10^{-2}$                                                                                                                              | Inhibition is neuroprotective in aging and AD [58]                                                                    |
|                                                                                                                                                                               | <i>mt-Nd3</i>                                                                                                        | ENSMUST0000082411                                                                                                                               | Mitochondrially encoded NADH dehydrogenase 3                                                                                                                                                                                                                                                                                 | -0.23                                                             | $4.06 \times 10^{-2}$                                                                                                                                                       | Partial inhibition of Complex I leads to reduced oxidative stress and increased long-term potentiation in AD mice [1] |
|                                                                                                                                                                               | <i>mt-Co3</i>                                                                                                        | ENSMUST0000082409                                                                                                                               | Mitochondrially encoded cytochrome c oxidase III                                                                                                                                                                                                                                                                             | -0.21                                                             | $3.87 \times 10^{-2}$                                                                                                                                                       | Loss leads to decrease in oxidative stress and amyloid formation in AD mice [4]                                       |
|                                                                                                                                                                               | <i>mt-Cytb</i>                                                                                                       | ENSMUST0000082421                                                                                                                               | Mitochondrially encoded cytochrome b                                                                                                                                                                                                                                                                                         | 0.21                                                              | $4.53 \times 10^{-2}$                                                                                                                                                       | Decreased in AD brain [6]                                                                                             |
|                                                                                                                                                                               | <i>Acad9</i>                                                                                                         | ENSMUST0000011492                                                                                                                               | Acyl-Coenzyme A dehydrogenase family, member 9                                                                                                                                                                                                                                                                               | 0.29                                                              | $2.59 \times 10^{-2}$                                                                                                                                                       | Role in fatty acid oxidation, downregulation associated with neurological disease [2]                                 |
|                                                                                                                                                                               | <i>Sdha</i>                                                                                                          | ENSMUST0000022062                                                                                                                               | Succinate dehydrogenase complex, subunit A, flavoprotein (Fp)                                                                                                                                                                                                                                                                | 0.29                                                              | $1.02 \times 10^{-2}$                                                                                                                                                       | Downregulation is associated with oxidative stress and insulin resistance [7]                                         |
|                                                                                                                                                                               | <i>Timmdc1</i>                                                                                                       | ENSMUST0000002925                                                                                                                               | Translocase of inner mitochondrial membrane domain containing 1                                                                                                                                                                                                                                                              | 0.36                                                              | $9.17 \times 10^{-3}$                                                                                                                                                       | Loss is associated with axonal neuropathy and cognitive decline [3]                                                   |
|                                                                                                                                                                               | <i>Taco1</i>                                                                                                         | ENSMUST0000002048                                                                                                                               | Translational activator of mitochondrially encoded cytochrome c oxidase I                                                                                                                                                                                                                                                    | 0.40                                                              | $3.68 \times 10^{-2}$                                                                                                                                                       | Loss associated with motor dysfunction and mitochondrial disease in mice [8]                                          |

|                                                                                                                           |                |                   |                                                                           |                |                                                |                                                                                                                       |
|---------------------------------------------------------------------------------------------------------------------------|----------------|-------------------|---------------------------------------------------------------------------|----------------|------------------------------------------------|-----------------------------------------------------------------------------------------------------------------------|
| Respiratory electron transport (R-HSA-611105)<br>LFC: -0.03<br>FDR: $2.92 \times 10^{-5}$                                 | <i>Ndufb2</i>  | ENSMUST0000119379 | NADH:ubiquinone oxidoreductase subunit B2                                 | -0.32 - 0.29 - | $2.39 \times 10^{-2}$<br>$2.89 \times 10^{-2}$ | Partial inhibition of Complex I leads to reduced oxidative stress and increased long-term potentiation in AD mice [1] |
|                                                                                                                           | <i>Ndufb4</i>  | ENSMUST0000023514 | NADH:ubiquinone oxidoreductase subunit B4                                 | 0.28 - 0.27 -  | $3.32 \times 10^{-2}$<br>$4.63 \times 10^{-2}$ |                                                                                                                       |
|                                                                                                                           | <i>Ndufb11</i> | ENSMUST0000116621 | NADH:ubiquinone oxidoreductase subunit B11                                | 0.25 - 0.23 -  | $4.69 \times 10^{-2}$<br>$4.16 \times 10^{-2}$ |                                                                                                                       |
|                                                                                                                           | <i>Ndufs8</i>  | ENSMUST0000237341 | NADH:ubiquinone oxidoreductase subunit S8                                 | 0.20           | $4.83 \times 10^{-2}$                          |                                                                                                                       |
|                                                                                                                           | <i>Ndufa4</i>  | ENSMUST0000204978 | Ndufa4, mitochondrial complex associated                                  |                |                                                |                                                                                                                       |
|                                                                                                                           | <i>Ndufb9</i>  | ENSMUST0000022980 | NADH:ubiquinone oxidoreductase subunit B9                                 |                |                                                |                                                                                                                       |
|                                                                                                                           | <i>Ndufa2</i>  | ENSMUST0000014438 | NADH:ubiquinone oxidoreductase subunit A2                                 |                |                                                |                                                                                                                       |
|                                                                                                                           | <i>Cox7b</i>   | ENSMUST0000033582 | Cytochrome c oxidase subunit 7B                                           | -0.31          | $1.13 \times 10^{-2}$                          |                                                                                                                       |
|                                                                                                                           | <i>Uqcrrh</i>  | ENSMUST0000078676 | Ubiquinol-cytochrome c reductase hinge protein                            | -0.29          | $3.04 \times 10^{-2}$                          |                                                                                                                       |
|                                                                                                                           | <i>mt-Nd3</i>  | ENSMUST0000082411 | Mitochondrially encoded NADH dehydrogenase 3                              | -0.23          | $4.06 \times 10^{-2}$                          |                                                                                                                       |
| The citric acid (TCA) cycle and respiratory electron transport (R-HSA-1428517)<br>LFC: 0.03<br>FDR: $2.71 \times 10^{-3}$ | <i>mt-Co3</i>  | ENSMUST0000082409 | Mitochondrially encoded cytochrome c oxidase III                          | -0.21          | $3.87 \times 10^{-2}$                          | Loss leads to decrease in oxidative stress and amyloid formation in AD mice [4]                                       |
|                                                                                                                           | <i>mt-Cytb</i> | ENSMUST0000082421 | Mitochondrially encoded cytochrome b                                      | 0.21           | $4.53 \times 10^{-2}$                          | Positive regulator of apoptosis via cytochrome c release [5]                                                          |
|                                                                                                                           | <i>Acad9</i>   | ENSMUST0000011492 | Acyl-Coenzyme A dehydrogenase family, member 9                            | 0.29           | $2.59 \times 10^{-2}$                          | Partial inhibition of Complex I leads to reduced oxidative stress and increased long-term potentiation in AD mice [1] |
|                                                                                                                           | <i>Sdha</i>    | ENSMUST0000022062 | Succinate dehydrogenase complex, subunit A, flavoprotein (Fp)             | 0.29           | $1.02 \times 10^{-2}$                          | Loss leads to decrease in oxidative stress and amyloid formation in AD mice [4]                                       |
|                                                                                                                           | <i>Timmdc1</i> | ENSMUST0000002925 | Translocase of inner mitochondrial membrane domain containing 1           | 0.36           | $9.17 \times 10^{-3}$                          | Decreased in AD brain [6]                                                                                             |
|                                                                                                                           | <i>Taco1</i>   | ENSMUST0000002048 | Translational activator of mitochondrially encoded cytochrome c oxidase I | 0.40           | $3.68 \times 10^{-2}$                          | Role in fatty acid oxidation, downregulation associated with neurological disease [2]                                 |
|                                                                                                                           |                |                   |                                                                           |                |                                                | Downregulation is associated with oxidative stress and insulin resistance [7]                                         |
|                                                                                                                           |                |                   |                                                                           |                |                                                | Loss is associated with axonal neuropathy and cognitive decline [3]                                                   |
|                                                                                                                           |                |                   |                                                                           |                |                                                | Loss associated with motor dysfunction and mitochondrial disease in mice [8]                                          |
|                                                                                                                           |                |                   |                                                                           |                |                                                |                                                                                                                       |
| The citric acid (TCA) cycle and respiratory electron transport (R-HSA-1428517)<br>LFC: 0.03<br>FDR: $2.71 \times 10^{-3}$ | <i>Ndufb2</i>  | ENSMUST0000119379 | NADH:ubiquinone oxidoreductase subunit B2                                 | -0.32 - 0.29 - | $2.39 \times 10^{-2}$<br>$2.89 \times 10^{-2}$ | Partial inhibition of Complex I leads to reduced oxidative stress and increased long-term potentiation in AD mice [1] |
|                                                                                                                           | <i>Ndufb4</i>  | ENSMUST0000023514 | NADH:ubiquinone oxidoreductase subunit B4                                 | 0.28 - 0.27 -  | $3.32 \times 10^{-2}$<br>$4.63 \times 10^{-2}$ |                                                                                                                       |
|                                                                                                                           | <i>Ndufb11</i> | ENSMUST0000116621 | NADH:ubiquinone oxidoreductase subunit B11                                | 0.25 - 0.23 -  | $4.69 \times 10^{-2}$<br>$4.16 \times 10^{-2}$ |                                                                                                                       |
|                                                                                                                           | <i>Ndufs8</i>  | ENSMUST0000237341 | NADH:ubiquinone oxidoreductase subunit S8                                 | 0.20           | $4.83 \times 10^{-2}$                          |                                                                                                                       |
|                                                                                                                           | <i>Ndufa4</i>  | ENSMUST0000204978 | Ndufa4, mitochondrial complex associated                                  |                |                                                |                                                                                                                       |
|                                                                                                                           | <i>Ndufb9</i>  | ENSMUST0000022980 | NADH:ubiquinone oxidoreductase subunit B9                                 |                |                                                |                                                                                                                       |
|                                                                                                                           | <i>Ndufa2</i>  | ENSMUST0000014438 | NADH:ubiquinone oxidoreductase subunit A2                                 |                |                                                |                                                                                                                       |
|                                                                                                                           | <i>Cox7b</i>   | ENSMUST0000033582 | Cytochrome c oxidase subunit 7B                                           | -0.31          | $1.13 \times 10^{-2}$                          |                                                                                                                       |
|                                                                                                                           |                |                   |                                                                           |                |                                                |                                                                                                                       |
|                                                                                                                           |                |                   |                                                                           |                |                                                |                                                                                                                       |
|                                                                                                                           |                |                   |                                                                           |                |                                                |                                                                                                                       |

|                                                                                                              |                                           |                                                             |                                                                                                                                           |                      |                                                                         |                                                                                                                       |
|--------------------------------------------------------------------------------------------------------------|-------------------------------------------|-------------------------------------------------------------|-------------------------------------------------------------------------------------------------------------------------------------------|----------------------|-------------------------------------------------------------------------|-----------------------------------------------------------------------------------------------------------------------|
|                                                                                                              | <i>Uqcrrh</i>                             | ENSMUST0000078676                                           | Ubiquinol-cytochrome c reductase hinge protein                                                                                            | -0.29                | $3.04 \times 10^{-2}$                                                   | Positive regulator of apoptosis via cytochrome c release [5]                                                          |
|                                                                                                              | <i>Atp5j2</i><br><i>Atp5h</i>             | ENSMUST0000161741<br>ENSMUST0000043931                      | ATP synthase, H+ transporting, mitochondrial F0 complex, subunit F2<br>ATP synthase, H+ transporting, mitochondrial F0 complex, subunit D | -0.27 - 0.26         | $1.82 \times 10^{-2}$<br>$3.98 \times 10^{-2}$                          | Inhibition is neuroprotective in aging and AD [58]                                                                    |
|                                                                                                              | <i>mt-Nd3</i>                             | ENSMUST0000082411                                           | Mitochondrially encoded NADH dehydrogenase 3                                                                                              | -0.23                | $4.06 \times 10^{-2}$                                                   | Partial inhibition of Complex I leads to reduced oxidative stress and increased long-term potentiation in AD mice [1] |
|                                                                                                              | <i>mt-Co3</i>                             | ENSMUST0000082409                                           | Mitochondrially encoded cytochrome c oxidase III                                                                                          | -0.21                | $3.87 \times 10^{-2}$                                                   | Loss leads to decrease in oxidative stress and amyloid formation in AD mice [4]                                       |
|                                                                                                              | <i>mt-Cytb</i>                            | ENSMUST0000082421                                           | Mitochondrially encoded cytochrome b                                                                                                      | 0.21                 | $4.53 \times 10^{-2}$                                                   | Decreased in AD brain [6]                                                                                             |
|                                                                                                              | <i>Acad9</i>                              | ENSMUST0000011492                                           | Acyl-Coenzyme A dehydrogenase family, member 9                                                                                            | 0.29                 | $2.59 \times 10^{-2}$                                                   | Role in fatty acid oxidation, downregulation associated with neurological disease [2]                                 |
|                                                                                                              | <i>Aco2</i>                               | ENSMUST0000023116                                           | Aconitase 2, mitochondrial                                                                                                                | 0.29                 | $1.42 \times 10^{-2}$                                                   | Suppressed by nitric oxide (Palmieri et al., 2020), Decreased in AD patient lymphocytes [9]                           |
|                                                                                                              | <i>Sdha</i>                               | ENSMUST0000022062                                           | Succinate dehydrogenase complex, subunit A, flavoprotein (Fp)                                                                             | 0.29                 | $1.02 \times 10^{-2}$                                                   | Downregulation is associated with oxidative stress and insulin resistance [7]                                         |
|                                                                                                              | <i>Ogdh</i>                               | ENSMUST0000003461                                           | Oxoglutarate (alpha-ketoglutarate) dehydrogenase (lipoamide)                                                                              | 0.30                 | $3.73 \times 10^{-2}$                                                   | Inhibited by lipopolysaccharide and IFN- $\gamma$ stimulation in macrophages [10]                                     |
|                                                                                                              | <i>Cs</i>                                 | ENSMUST0000005826                                           | Citrate synthase                                                                                                                          | 0.32                 | $1.53 \times 10^{-2}$                                                   | Downregulated in AD patient platelets [11]                                                                            |
|                                                                                                              | <i>Pdk2</i>                               | ENSMUST0000038431                                           | Pyruvate dehydrogenase kinase, isoenzyme 2                                                                                                | 0.35                 | $4.52 \times 10^{-2}$                                                   | mRNA levels modulated during aging in brain [12]                                                                      |
|                                                                                                              | <i>Timmdc1</i>                            | ENSMUST0000002925                                           | Translocase of inner mitochondrial membrane domain containing 1                                                                           | 0.36                 | $9.17 \times 10^{-3}$                                                   | Loss is associated with axonal neuropathy and cognitive decline [3]                                                   |
|                                                                                                              | <i>Taco1</i>                              | ENSMUST0000002048                                           | Translational activator of mitochondrially encoded cytochrome c oxidase I                                                                 | 0.40                 | $3.68 \times 10^{-2}$                                                   | Loss associated with motor dysfunction and mitochondrial disease in mice [8]                                          |
| Transport to the Golgi and subsequent modification (R-HSA-948021)<br>LFC: 0.27<br>FDR: $5.71 \times 10^{-3}$ | <i>Arcn1</i>                              | ENSMUST0000034607                                           | Archain 1                                                                                                                                 | 0.24                 | $2.71 \times 10^{-2}$                                                   | Loss is associated with increased ER stress [13]                                                                      |
|                                                                                                              | <i>Dctn4</i> <i>Dctn5</i><br><i>Dctn1</i> | ENSMUST0000025505<br>ENSMUST0000033156<br>ENSMUST0000113919 | Dynactin 4<br>Dynactin 5<br>Dynactin 1                                                                                                    | 0.25<br>0.30<br>0.56 | $4.42 \times 10^{-2}$<br>$2.38 \times 10^{-2}$<br>$2.10 \times 10^{-2}$ | Positive regulators of retrograde axonal transport, decreased activity associated with neurodegeneration [14]         |
|                                                                                                              | <i>Ykt6</i>                               | ENSMUST0000002818                                           | YKT6 v-SNARE homolog (S. cerevisiae)                                                                                                      | 0.26                 | $1.97 \times 10^{-2}$                                                   | Negative regulator of $\alpha$ -synuclein, downregulated in PD brain [15]                                             |
|                                                                                                              | <i>Kdelr2</i>                             | ENSMUST0000110731                                           | KDEL (Lys-Asp-Glu-Leu) endoplasmic reticulum protein retention receptor 2                                                                 | 0.27                 | $4.30 \times 10^{-2}$                                                   | Regulator of ER proteome homeostasis in response to ER stress [16]                                                    |

|                                                                                   |                                                                                                                                |                                                                                                                                                                                                                                                              |                                      |                                                                                                                           |                                                                                                                                            |
|-----------------------------------------------------------------------------------|--------------------------------------------------------------------------------------------------------------------------------|--------------------------------------------------------------------------------------------------------------------------------------------------------------------------------------------------------------------------------------------------------------|--------------------------------------|---------------------------------------------------------------------------------------------------------------------------|--------------------------------------------------------------------------------------------------------------------------------------------|
| <i>Man1a2</i><br><i>Man2a2</i>                                                    | ENSMUST0<br>0000008907<br>ENSMUST0<br>0000098346                                                                               | Mannosidase, alpha, class 1A,<br>member 2<br>Mannosidase 2, alpha 2                                                                                                                                                                                          | 0.28<br>0.65                         | $3.16 \times 10^{-2}$<br>$1.70 \times 10^{-2}$                                                                            | Regulators of N-<br>glycosylation [17]                                                                                                     |
| <i>Copz1</i><br><i>Copg1</i>                                                      | ENSMUST0<br>0000100162<br>ENSMUST0<br>0000113607                                                                               | Coatomer protein complex,<br>subunit zeta 1<br>Coatomer protein complex,<br>subunit gamma 1                                                                                                                                                                  | 0.30<br>0.46                         | $1.59 \times 10^{-2}$<br>$4.97 \times 10^{-3}$                                                                            | Positive regulators of<br>neurite outgrowth [18]                                                                                           |
| <i>Tbc1d20</i>                                                                    | ENSMUST0<br>0000028963                                                                                                         | TBC1 domain family,<br>member 20                                                                                                                                                                                                                             | 0.32                                 | $4.24 \times 10^{-2}$                                                                                                     | Downregulation leads to<br>disrupted neuronal<br>autophagic flux and motor<br>dysfunction [19]                                             |
| <i>Cog4</i><br><i>Cog1</i>                                                        | ENSMUST0<br>0000034203<br>ENSMUST0<br>0000018805                                                                               | Component of oligomeric<br>golgi complex 4<br>Component of oligomeric<br>golgi complex 1                                                                                                                                                                     | 0.34<br>0.44                         | $1.62 \times 10^{-2}$<br>$8.60 \times 10^{-3}$                                                                            | Regulator of Golgi vesicle<br>trafficking, defects are<br>associated with neurological<br>disorders [20]                                   |
| <i>Gosr2</i> <i>Gosr1</i>                                                         | ENSMUST0<br>0000021329<br>ENSMUST0<br>0000010536                                                                               | Golgi SNAP receptor<br>complex member 2<br>Golgi SNAP receptor<br>complex member 1                                                                                                                                                                           | 0.35<br>0.38                         | $9.17 \times 10^{-3}$<br>$6.24 \times 10^{-3}$                                                                            | Regulator of ER to Golgi<br>trafficking, dysregulation<br>associated with neurological<br>disorders [21]                                   |
| <i>Dynll2</i><br><i>Dync1li1</i><br><i>Dync1h1</i>                                | ENSMUST0<br>0000020775<br>ENSMUST0<br>0000047404<br>ENSMUST0<br>0000018851                                                     | Dynein light chain LC8-type 2<br>Dynein cytoplasmic 1 light<br>intermediate chain 1<br>Dynein cytoplasmic 1 heavy<br>chain 1                                                                                                                                 | 0.36<br>0.38<br>0.50                 | $5.25 \times 10^{-3}$<br>$7.11 \times 10^{-3}$<br>$1.28 \times 10^{-2}$                                                   | Positive regulators of<br>retrograde axonal transport<br>[22], Downregulated in AD<br>hippocampus [23]                                     |
| <i>Sec22b</i><br><i>Sec24b</i><br><i>Sec31a</i><br><i>Sec24c</i><br><i>Sec22c</i> | ENSMUST0<br>0000029476<br>ENSMUST0<br>0000001079<br>ENSMUST0<br>0000094578<br>ENSMUST0<br>0000048657<br>ENSMUST0<br>0000078547 | SEC22 homolog B, vesicle<br>trafficking protein<br>Sec24 related gene family,<br>member B (S. cerevisiae)<br>Sec31 homolog A (S.<br>cerevisiae)<br>Sec24 related gene family,<br>member C (S. cerevisiae)<br>SEC22 homolog C, vesicle<br>trafficking protein | 0.36<br>0.40<br>0.46<br>0.49<br>0.82 | $3.74 \times 10^{-2}$<br>$9.12 \times 10^{-3}$<br>$7.12 \times 10^{-3}$<br>$1.35 \times 10^{-2}$<br>$3.28 \times 10^{-3}$ | Regulators of vesicle<br>trafficking, downregulated<br>in aging and AD brains [24],<br>Loss leads to neuronal<br>apoptotic cell death [25] |
| <i>Tmed9</i>                                                                      | ENSMUST0<br>0000109905                                                                                                         | Transmembrane p24<br>trafficking protein 9                                                                                                                                                                                                                   | 0.38                                 | $1.50 \times 10^{-2}$                                                                                                     | Positive regulator of<br>autophagosome biogenesis<br>[26]                                                                                  |
| <i>Napa</i>                                                                       | ENSMUST0<br>0000006181                                                                                                         | N-ethylmaleimide sensitive<br>fusion protein attachment<br>protein alpha                                                                                                                                                                                     | 0.41                                 | $2.59 \times 10^{-2}$                                                                                                     | Loss leads to impairment of<br>Golgi to ER trafficking and<br>apoptosis [27]                                                               |
| <i>Actr1a</i>                                                                     | ENSMUST0<br>0000040270                                                                                                         | ARP1 actin-related protein<br>1A, centractin alpha                                                                                                                                                                                                           | 0.41                                 | $4.56 \times 10^{-3}$                                                                                                     | Positive regulator of<br>retrograde axonal transport<br>[28]                                                                               |
| <i>Trappc5</i><br><i>Trappc9</i>                                                  | ENSMUST0<br>0000044857<br>ENSMUST0<br>0000089770                                                                               | Trafficking protein particle<br>complex 5<br>Trafficking protein particle<br>complex 9                                                                                                                                                                       | 0.42<br>0.43                         | $6.44 \times 10^{-3}$<br>$3.92 \times 10^{-2}$                                                                            | Loss leads to decreased<br>social memory and obesity<br>in mice [29]                                                                       |
| <i>Tubb6</i><br><i>Tuba4a</i>                                                     | ENSMUST0<br>0000001513<br>ENSMUST0<br>0000186213                                                                               | Tubulin, beta 6 class V<br>Tubulin, alpha 4A                                                                                                                                                                                                                 | 0.45<br>0.52                         | $4.40 \times 10^{-2}$<br>$8.60 \times 10^{-3}$                                                                            | Downregulation leads to<br>motor axon defects [30]                                                                                         |
| <i>Tmem115</i>                                                                    | ENSMUST0<br>0000010189                                                                                                         | Transmembrane protein 115                                                                                                                                                                                                                                    | 0.45                                 | $7.28 \times 10^{-3}$                                                                                                     | Regulator of Golgi to ER<br>retrograde transport [31]                                                                                      |
| <i>Arfgap1</i>                                                                    | ENSMUST0<br>0000029092                                                                                                         | ADP-ribosylation factor<br>GTPase activating protein 1                                                                                                                                                                                                       | 0.46                                 | $1.28 \times 10^{-2}$                                                                                                     | Regulator of targeting of<br>GABA transporter 1 in axon<br>terminals [32]                                                                  |

|                                                                                                       |                                                    |                                                                            |                                                                                                                                                                                                                            |                       |                                                                         |                                                                                                                           |
|-------------------------------------------------------------------------------------------------------|----------------------------------------------------|----------------------------------------------------------------------------|----------------------------------------------------------------------------------------------------------------------------------------------------------------------------------------------------------------------------|-----------------------|-------------------------------------------------------------------------|---------------------------------------------------------------------------------------------------------------------------|
|                                                                                                       | <i>Mgat4b</i><br><i>Mgat5</i>                      | ENSMUST0<br>0000041725<br>ENSMUST0<br>0000038361                           | Mannoside<br>acetylglucosaminyltransferase 4, isoenzyme B Mannoside<br>acetylglucosaminyltransferase 5                                                                                                                     | 0.47<br>0.70          | $1.50 \times 10^{-2}$<br>$3.81 \times 10^{-3}$                          | Negative regulators of<br>spontaneous inflammatory<br>demyelination and<br>neurodegeneration [33]                         |
|                                                                                                       | <i>B4gal13</i><br><i>B4gal16</i><br><i>B4gal15</i> | ENSMUST0<br>0000064272<br>ENSMUST0<br>0000070080<br>ENSMUST0<br>0000109221 | UDP-Gal:betaGlcNAc beta<br>1,4-galactosyltransferase,<br>polypeptide 3<br>UDP-Gal:betaGlcNAc beta<br>1,4-galactosyltransferase,<br>polypeptide 6<br>UDP-Gal:betaGlcNAc beta<br>1,4-galactosyltransferase,<br>polypeptide 5 | 0.48<br>0.57<br>0.62  | $3.60 \times 10^{-2}$<br>$4.56 \times 10^{-3}$<br>$3.27 \times 10^{-3}$ | Regulators of inflammatory<br>cytokine response in LPS-<br>treated microglia [34]                                         |
|                                                                                                       | <i>Uso1</i>                                        | ENSMUST0<br>0000031355                                                     | USO1 vesicle docking factor                                                                                                                                                                                                | 0.50                  | $9.05 \times 10^{-3}$                                                   | Positive regulator of ER to<br>Golgi transport [35]                                                                       |
|                                                                                                       | <i>St8sia3</i>                                     | ENSMUST0<br>0000025477                                                     | ST8 alpha-N-acetyl-<br>neuraminide alpha-2,8-<br>sialyltransferase 3                                                                                                                                                       | 0.52                  | $5.84 \times 10^{-3}$                                                   | Regulator of dopamine D1R<br>and D2R receptors,<br>downregulated in<br>neurodegenerative disease<br>[36]                  |
|                                                                                                       | <i>Cnih3</i>                                       | ENSMUST0<br>0000027795                                                     | Cornichon family AMPA<br>receptor auxiliary protein 3                                                                                                                                                                      | 0.54                  | $2.00 \times 10^{-2}$                                                   | Positive regulator of<br>hippocampal AMPAR<br>synaptic transmission [37]                                                  |
|                                                                                                       | <i>Arf3</i>                                        | ENSMUST0<br>0000053183                                                     | ADP-ribosylation factor 3                                                                                                                                                                                                  | 0.56                  | $7.12 \times 10^{-2}$                                                   | Paralog ARF6 mediates<br>BACE1 and APP processing<br>[38]                                                                 |
|                                                                                                       | <i>Ppp6r1</i>                                      | ENSMUST0<br>0000064099                                                     | Protein phosphatase 6,<br>regulatory subunit 1                                                                                                                                                                             | 0.56                  | $4.91 \times 10^{-3}$                                                   | Negative regulator of NF- $\kappa$ B<br>signaling [39]                                                                    |
|                                                                                                       | <i>Nsf</i>                                         | ENSMUST0<br>0000103075                                                     | N-ethylmaleimide sensitive<br>fusion protein                                                                                                                                                                               | 0.59                  | $2.66 \times 10^{-2}$                                                   | Positive regulator of<br>synaptic AMPA receptor<br>function [40]                                                          |
|                                                                                                       | <i>Sptbn2</i><br><i>Sptbn1</i>                     | ENSMUST0<br>0000008991<br>ENSMUST0<br>0000011877                           | Spectrin beta, non-<br>erythrocytic 2<br>Spectrin beta, non-<br>erythrocytic 1                                                                                                                                             | 0.62<br>0.85          | $7.88 \times 10^{-3}$<br>$4.89 \times 10^{-3}$                          | Loss leads to decrease in<br>dendritic spine density and<br>neurodegeneration [41]                                        |
|                                                                                                       | <i>Csnk1d</i>                                      | ENSMUST0<br>0000070575                                                     | Casein kinase 1, delta                                                                                                                                                                                                     | 0.65                  | $5.83 \times 10^{-3}$                                                   | Positive regulator of Wnt/ $\beta$ -<br>catenin signaling [42]                                                            |
|                                                                                                       | <i>Lman2</i><br><i>Lman2l</i>                      | ENSMUST0<br>0000021940<br>ENSMUST0<br>0000125304                           | Lectin, mannose-binding 2<br>Lectin, mannose-binding 2-<br>like                                                                                                                                                            | 0.69<br>0.86          | $5.30 \times 10^{-3}$<br>$5.07 \times 10^{-3}$                          | Regulator of glycoprotein<br>transport and sorting,<br>dysregulation associated<br>with neurodegenerative<br>disease [43] |
|                                                                                                       | <i>Gbf1</i>                                        | ENSMUST0<br>0000026254                                                     | Golgi-specific brefeldin A-<br>resistance factor 1                                                                                                                                                                         | 0.69                  | $7.23 \times 10^{-3}$                                                   | Dysregulation associated<br>with Golgi fragmentation<br>[44]                                                              |
|                                                                                                       | <i>Fut8</i>                                        | ENSMUST0<br>0000062804                                                     | Fucosyltransferase 8                                                                                                                                                                                                       | 0.84                  | $3.62 \times 10^{-3}$                                                   | Loss leads to increased<br>microgliosis under LPS<br>stimulation [45]                                                     |
| Processing of<br>Intronless Pre-<br>mRNAs<br>(R-HSA-77595)<br>LFC: 0.29<br>FDR: $7.79 \times 10^{-3}$ | <i>Cstf2</i><br><i>Cstf1</i> <i>Cstf2t</i>         | ENSMUST0<br>0000113286<br>ENSMUST0<br>0000116375<br>ENSMUST0<br>0000066039 | Cleavage stimulation factor,<br>3' pre-RNA subunit 2<br>Cleavage stimulation factor,<br>3' pre-RNA, subunit Cleavage<br>stimulation factor, 3' pre-<br>RNA subunit 2, tau                                                  | -0.70<br>0.33<br>0.34 | $3.86 \times 10^{-2}$<br>$1.41 \times 10^{-2}$<br>$1.29 \times 10^{-2}$ | Positive regulators of 3'<br>cleavage and<br>polyadenylation [46]                                                         |
|                                                                                                       | <i>Nudt21</i>                                      | ENSMUST0<br>0000034204                                                     | Nudix (nucleoside<br>diphosphate linked moiety<br>X)-type motif 21                                                                                                                                                         | 0.23                  | $2.59 \times 10^{-2}$                                                   | Loss leads to dysregulated<br>hippocampal alternative<br>polyadenylation and<br>learning deficits [47]                    |

|                                                                                                                                                             |                                                                     |                                                                                                      |                                                                                                                                                                                                                                                           |                              |                                                                                                  |                                                                                                                                                                |
|-------------------------------------------------------------------------------------------------------------------------------------------------------------|---------------------------------------------------------------------|------------------------------------------------------------------------------------------------------|-----------------------------------------------------------------------------------------------------------------------------------------------------------------------------------------------------------------------------------------------------------|------------------------------|--------------------------------------------------------------------------------------------------|----------------------------------------------------------------------------------------------------------------------------------------------------------------|
|                                                                                                                                                             | <i>Ncbp1</i><br><i>Ncbp2</i>                                        | ENSMUST0<br>0000030014<br>ENSMUST0<br>0000023460                                                     | Nuclear cap binding protein<br>subunit 1<br>Nuclear cap binding protein<br>subunit 2                                                                                                                                                                      | 0.25<br>0.28                 | $3.87 \times 10^{-2}$<br>$1.48 \times 10^{-2}$                                                   | Positive regulator of mRNA<br>export from the nucleus [48]                                                                                                     |
|                                                                                                                                                             | <i>Cpsf7</i> <i>Cpsf2</i>                                           | ENSMUST0<br>0000038379<br>ENSMUST0<br>0000047357                                                     | Cleavage and<br>polyadenylation specific<br>factor 7<br>Cleavage and<br>polyadenylation specific<br>factor 2                                                                                                                                              | 0.28<br>0.34                 | $2.41 \times 10^{-2}$<br>$1.26 \times 10^{-2}$                                                   | Positive regulators of 3'<br>cleavage and<br>polyadenylation [46]                                                                                              |
|                                                                                                                                                             | <i>Wdr33</i>                                                        | ENSMUST0<br>0000025264                                                                               | WD repeat domain 33                                                                                                                                                                                                                                       | 0.29                         | $2.75 \times 10^{-2}$                                                                            | Positive regulator of<br>polyadenylation signal<br>recognition [49]                                                                                            |
|                                                                                                                                                             | <i>Papola</i>                                                       | ENSMUST0<br>0000109901                                                                               | Poly (A) polymerase alpha                                                                                                                                                                                                                                 | 0.39                         | $3.72 \times 10^{-2}$                                                                            | Positive regulator of<br>polyadenylation [46]                                                                                                                  |
|                                                                                                                                                             | <i>Sympk</i>                                                        | ENSMUST0<br>0000023882                                                                               | Symplekin                                                                                                                                                                                                                                                 | 0.48                         | $7.15 \times 10^{-3}$                                                                            | Positive regulator of<br>polyadenylation [50],<br>Downregulated in AD brain<br>[51]                                                                            |
|                                                                                                                                                             |                                                                     |                                                                                                      |                                                                                                                                                                                                                                                           |                              |                                                                                                  |                                                                                                                                                                |
| Disassembly of the<br>destruction<br>complex and<br>recruitment of<br>AXIN to the<br>membrane<br>(R-HSA-4641262)<br>LFC: 0.38<br>FDR: $7.21 \times 10^{-3}$ | <i>Ppp2cb</i><br><i>Ppp2r5a</i><br><i>Ppp2r5e</i><br><i>Ppp2r1a</i> | ENSMUST0<br>0000009774<br>ENSMUST0<br>0000067976<br>ENSMUST0<br>0000021447<br>ENSMUST0<br>0000007708 | Protein phosphatase 2<br>(formerly 2A), catalytic<br>subunit, beta isoform Protein<br>phosphatase 2, regulatory<br>subunit B', alpha Protein<br>phosphatase 2, regulatory<br>subunit B', epsilon<br>Protein phosphatase 2,<br>regulatory subunit A, alpha | 0.25<br>0.26<br>0.31<br>0.37 | $1.94 \times 10^{-2}$<br>$4.25 \times 10^{-2}$<br>$2.85 \times 10^{-2}$<br>$3.87 \times 10^{-2}$ | Positive regulator of Wnt/ $\beta$ -<br>catenin signaling [52],<br>Inhibition leads to spatial<br>memory impairment [53]                                       |
|                                                                                                                                                             | <i>Csnk1a1</i><br><i>Csnk1g2</i>                                    | ENSMUST0<br>0000165123<br>ENSMUST0<br>0000085435                                                     | Casein kinase 1, alpha 1<br>Casein kinase 1, gamma 2                                                                                                                                                                                                      | 0.26<br>0.33                 | $3.90 \times 10^{-2}$<br>$4.73 \times 10^{-2}$                                                   | Negative regulators of<br>SMAD3 and TGF- $\beta$<br>signaling [54]                                                                                             |
|                                                                                                                                                             | <i>Ctnnb1</i>                                                       | ENSMUST0<br>0000007130                                                                               | Catenin (cadherin associated<br>protein), beta 1                                                                                                                                                                                                          | 0.37                         | $1.38 \times 10^{-2}$                                                                            | Positive regulator of Wnt/ $\beta$ -<br>catenin signaling, neuronal<br>survival and synaptic<br>plasticity, negative regulator<br>of A $\beta$ production [55] |
|                                                                                                                                                             | <i>Gsk3b</i>                                                        | ENSMUST0<br>0000023507                                                                               | Glycogen synthase kinase 3<br>beta                                                                                                                                                                                                                        | 0.52                         | $3.62 \times 10^{-3}$                                                                            | Regulator of Wnt/ $\beta$ -catenin<br>signaling, loss leads to<br>synaptic and social defects<br>in mice [56]                                                  |
|                                                                                                                                                             | <i>Dvl3</i>                                                         | ENSMUST0<br>0000003318                                                                               | Dishevelled segment polarity<br>protein 3                                                                                                                                                                                                                 | 0.72                         | $2.23 \times 10^{-2}$                                                                            | Positive regulator of Wnt/ $\beta$ -<br>catenin signaling,<br>downregulated in AD brain<br>[55]                                                                |
|                                                                                                                                                             | <i>Fzd1</i>                                                         | ENSMUST0<br>0000054294                                                                               | Frizzled class receptor 1                                                                                                                                                                                                                                 | 0.73                         | $3.81 \times 10^{-3}$                                                                            | Positive regulator of Wnt/ $\beta$ -<br>catenin signaling, loss leads<br>to impairment of neuronal<br>differentiation [57]                                     |
|                                                                                                                                                             |                                                                     |                                                                                                      |                                                                                                                                                                                                                                                           |                              |                                                                                                  |                                                                                                                                                                |

## References

1. Stojakovic, A.; Trushin, S.; Sheu, A.; Khalili, L.; Chang, S.Y.; Li, X.; Christensen, T.; Salisbury, J.L.; Geroux, R.E.; Gateno, B.; et al. Partial inhibition of mitochondrial complex I ameliorates Alzheimer's disease pathology and cognition in APP/PS1 female mice. *Commun Biol* **2021**, *4*, 61, doi:10.1038/s42003-020-01584-y.
2. Schiff, M.; Haberberger, B.; Xia, C.; Mohsen, A.W.; Goetzman, E.S.; Wang, Y.; Uppala, R.; Zhang, Y.; Karunanidhi, A.; Prabhu, D.; et al. Complex I assembly function and fatty acid oxidation enzyme activity of ACAD9 both contribute to disease severity in ACAD9 deficiency. *Hum Mol Genet* **2015**, *24*, 3238-3247, doi:10.1093/hmg/ddv074.

3. Kumar, R.; Corbett, M.A.; Smith, N.J.C.; Hock, D.H.; Kikhtyak, Z.; Semcesen, L.N.; Morimoto, A.; Lee, S.; Stroud, D.A.; Gleeson, J.G.; et al. Oligonucleotide correction of an intronic TIMMDC1 variant in cells of patients with severe neurodegenerative disorder. *NPJ Genom Med* **2022**, *7*, 9, doi:10.1038/s41525-021-00277-7.
4. Fukui, H.; Diaz, F.; Garcia, S.; Moraes, C.T. Cytochrome c oxidase deficiency in neurons decreases both oxidative stress and amyloid formation in a mouse model of Alzheimer's disease. *Proc Natl Acad Sci U S A* **2007**, *104*, 14163-14168, doi:10.1073/pnas.0705738104.
5. Okazaki, M.; Ishibashi, Y.; Asoh, S.; Ohta, S. Overexpressed mitochondrial hinge protein, a cytochrome c-binding protein, accelerates apoptosis by enhancing the release of cytochrome c from mitochondria. *Biochem Biophys Res Commun* **1998**, *243*, 131-136, doi:10.1006/bbrc.1997.7979.
6. Kim, S.H.; Vlkolinsky, R.; Cairns, N.; Lubec, G. Decreased levels of complex III core protein 1 and complex V beta chain in brains from patients with Alzheimer's disease and Down syndrome. *Cell Mol Life Sci* **2000**, *57*, 1810-1816, doi:10.1007/pl00000661.
7. Pomytkin, I.; Pinelis, V. Brain Insulin Resistance: Focus on Insulin Receptor-Mitochondria Interactions. *Life (Basel)* **2021**, *11*, doi:10.3390/life11030262.
8. Richman, T.R.; Spahr, H.; Ermer, J.A.; Davies, S.M.; Viola, H.M.; Bates, K.A.; Papadimitriou, J.; Hool, L.C.; Rodger, J.; Larsson, N.G.; et al. Loss of the RNA-binding protein TACO1 causes late-onset mitochondrial dysfunction in mice. *Nat Commun* **2016**, *7*, 11884, doi:10.1038/ncomms11884.
9. Mangialasche, F.; Baglioni, M.; Cecchetti, R.; Kivipelto, M.; Ruggiero, C.; Piobbico, D.; Kussmaul, L.; Monastero, R.; Brancorsini, S.; Mecocci, P. Lymphocytic mitochondrial aconitase activity is reduced in Alzheimer's disease and mild cognitive impairment. *J Alzheimers Dis* **2015**, *44*, 649-660, doi:10.3233/JAD-142052.
10. Seim, G.L.; Britt, E.C.; John, S.V.; Yeo, F.J.; Johnson, A.R.; Eisenstein, R.S.; Pagliarini, D.J.; Fan, J. Two-stage metabolic remodelling in macrophages in response to lipopolysaccharide and interferon-gamma stimulation. *Nat Metab* **2019**, *1*, 731-742, doi:10.1038/s42255-019-0083-2.
11. Fisar, Z.; Hroudova, J.; Hansikova, H.; Spacilova, J.; Lelkova, P.; Wenchich, L.; Jirak, R.; Zverova, M.; Zeman, J.; Martasek, P.; et al. Mitochondrial Respiration in the Platelets of Patients with Alzheimer's Disease. *Curr Alzheimer Res* **2016**, *13*, 930-941, doi:10.2174/1567205013666160314150856.
12. Nakai, N.; Obayashi, M.; Nagasaki, M.; Sato, Y.; Fujitsuka, N.; Yoshimura, A.; Miyazaki, Y.; Sugiyama, S.; Shimomura, Y. The abundance of mRNAs for pyruvate dehydrogenase kinase isoenzymes in brain regions of young and aged rats. *Life Sci* **2000**, *68*, 497-503, doi:10.1016/s0024-3205(00)00947-4.
13. Izumi, K.; Brett, M.; Nishi, E.; Drunat, S.; Tan, E.S.; Fujiki, K.; Lebon, S.; Cham, B.; Masuda, K.; Arakawa, M.; et al. ARCN1 Mutations Cause a Recognizable Craniofacial Syndrome Due to COPI-Mediated Transport Defects. *Am J Hum Genet* **2016**, *99*, 451-459, doi:10.1016/j.ajhg.2016.06.011.
14. LaMonte, B.H.; Wallace, K.E.; Holloway, B.A.; Shelly, S.S.; Ascano, J.; Tokito, M.; Van Winkle, T.; Howland, D.S.; Holzbaur, E.L. Disruption of dynein/dynactin inhibits axonal transport in motor neurons causing late-onset progressive degeneration. *Neuron* **2002**, *34*, 715-727, doi:10.1016/s0896-6273(02)00696-7.
15. Cuddy, L.K.; Wani, W.Y.; Morella, M.L.; Pitcairn, C.; Tsutsumi, K.; Fredriksen, K.; Justman, C.J.; Grammatopoulos, T.N.; Belur, N.R.; Zunke, F.; et al. Stress-Induced Cellular Clearance Is Mediated by the SNARE Protein ykt6 and Disrupted by alpha-Synuclein. *Neuron* **2019**, *104*, 869-884 e811, doi:10.1016/j.neuron.2019.09.001.
16. Trychta, K.A.; Back, S.; Henderson, M.J.; Harvey, B.K. KDEL Receptors Are Differentially Regulated to Maintain the ER Proteome under Calcium Deficiency. *Cell Rep* **2018**, *25*, 1829-1840 e1826, doi:10.1016/j.celrep.2018.10.055.
17. Akama, T.O.; Nakagawa, H.; Wong, N.K.; Sutton-Smith, M.; Dell, A.; Morris, H.R.; Nakayama, J.; Nishimura, S.; Pai, A.; Moremen, K.W.; et al. Essential and mutually compensatory roles of {alpha}-mannosidase II and {alpha}-mannosidase IIx in N-glycan processing in vivo in mice. *Proc Natl Acad Sci U S A* **2006**, *103*, 8983-8988, doi:10.1073/pnas.0603248103.



18. Jain Goyal, M.; Zhao, X.; Bozhinova, M.; Andrade-Lopez, K.; de Heus, C.; Schulze-Dramac, S.; Muller-McNicoll, M.; Klumperman, J.; Bethune, J. A paralog-specific role of COPI vesicles in the neuronal differentiation of mouse pluripotent cells. *Life Sci Alliance* **2020**, *3*, doi:10.26508/lsa.202000714.
19. Sidjanin, D.J.; Park, A.K.; Ronchetti, A.; Martins, J.; Jackson, W.T. TBC1D20 mediates autophagy as a key regulator of autophagosome maturation. *Autophagy* **2016**, *12*, 1759-1775, doi:10.1080/15548627.2016.1199300.
20. Climer, L.K.; Dobretsov, M.; Lupashin, V. Defects in the COG complex and COG-related trafficking regulators affect neuronal Golgi function. *Front Neurosci* **2015**, *9*, 405, doi:10.3389/fnins.2015.00405.
21. Jepson, J.E.C.; Prashberger, R.; Krishnakumar, S.S. Mechanisms of Neurological Dysfunction in GOSR2 Progressive Myoclonus Epilepsy, a Golgi SNAREopathy. *Neuroscience* **2019**, *420*, 41-49, doi:10.1016/j.neuroscience.2019.03.057.
22. Zhao, J.; Wang, Y.; Xu, H.; Fu, Y.; Qian, T.; Bo, D.; Lu, Y.X.; Xiong, Y.; Wan, J.; Zhang, X.; et al. Dync1h1 Mutation Causes Proprioceptive Sensory Neuron Loss and Impaired Retrograde Axonal Transport of Dorsal Root Ganglion Neurons. *CNS Neurosci Ther* **2016**, *22*, 593-601, doi:10.1111/cns.12552.
23. Schrotter, A.; Oberhaus, A.; Kolbe, K.; Seger, S.; Mastalski, T.; El Magraoui, F.; Hoffmann-Posorske, E.; Bohnert, M.; Deckert, J.; Braun, C.; et al. LMD proteomics provides evidence for hippocampus field-specific motor protein abundance changes with relevance to Alzheimer's disease. *Biochim Biophys Acta Proteins Proteom* **2017**, *1865*, 703-714, doi:10.1016/j.bbapap.2017.03.013.
24. Berchtold, N.C.; Coleman, P.D.; Cribbs, D.H.; Rogers, J.; Gillen, D.L.; Cotman, C.W. Synaptic genes are extensively downregulated across multiple brain regions in normal human aging and Alzheimer's disease. *Neurobiol Aging* **2013**, *34*, 1653-1661, doi:10.1016/j.neurobiolaging.2012.11.024.
25. Wang, B.; Joo, J.H.; Mount, R.; Teubner, B.J.W.; Krenzer, A.; Ward, A.L.; Ichhaporia, V.P.; Adams, E.J.; Khoriaty, R.; Peters, S.T.; et al. The COPII cargo adapter SEC24C is essential for neuronal homeostasis. *J Clin Invest* **2018**, *128*, 3319-3332, doi:10.1172/JCI98194.
26. Li, S.; Yan, R.; Xu, J.; Zhao, S.; Ma, X.; Sun, Q.; Zhang, M.; Li, Y.; Liu, J.G.; Chen, L.; et al. A new type of ERGIC-ERES membrane contact mediated by TMED9 and SEC12 is required for autophagosome biogenesis. *Cell Res* **2022**, *32*, 119-138, doi:10.1038/s41422-021-00563-0.
27. Naydenov, N.G.; Harris, G.; Brown, B.; Schaefer, K.L.; Das, S.K.; Fisher, P.B.; Ivanov, A.I. Loss of soluble N-ethylmaleimide-sensitive factor attachment protein alpha (alphaSNAP) induces epithelial cell apoptosis via down-regulation of Bcl-2 expression and disruption of the Golgi. *J Biol Chem* **2012**, *287*, 5928-5941, doi:10.1074/jbc.M111.278358.
28. Akila Parvathy Dharshini, S.; Taguchi, Y.H.; Michael Gromiha, M. Exploring the selective vulnerability in Alzheimer disease using tissue specific variant analysis. *Genomics* **2019**, *111*, 936-949, doi:10.1016/j.ygeno.2018.05.024.
29. Liang, Z.S.; Cimino, I.; Yalcin, B.; Raghupathy, N.; Vancollie, V.E.; Ibarra-Soria, X.; Firth, H.V.; Rimmington, D.; Farooqi, I.S.; Lelliott, C.J.; et al. Trappc9 deficiency causes parent-of-origin dependent microcephaly and obesity. *PLoS Genet* **2020**, *16*, e1008916, doi:10.1371/journal.pgen.1008916.
30. Helferich, A.M.; Brockmann, S.J.; Reinders, J.; Deshpande, D.; Holzmann, K.; Brenner, D.; Andersen, P.M.; Petri, S.; Thal, D.R.; Michaelis, J.; et al. Dysregulation of a novel miR-1825/TBCB/TUBA4A pathway in sporadic and familial ALS. *Cell Mol Life Sci* **2018**, *75*, 4301-4319, doi:10.1007/s00018-018-2873-1.
31. Ong, Y.S.; Tran, T.H.; Gouko, N.V.; Hong, W. TMEM115 is an integral membrane protein of the Golgi complex involved in retrograde transport. *J Cell Sci* **2014**, *127*, 2825-2839, doi:10.1242/jcs.136754.
32. Chorny, S.; Parnis, A.; Shmoish, M.; Cassel, D. High abundance of ArfGAP1 found in the mossy fibers in hilus of the dentate gyrus region of the mouse brain. *PLoS One* **2017**, *12*, e0189659, doi:10.1371/journal.pone.0189659.
33. Mkhikian, H.; Grigorian, A.; Li, C.F.; Chen, H.L.; Newton, B.; Zhou, R.W.; Beeton, C.; Torossian, S.; Tatarian, G.G.; Lee, S.U.; et al. Genetics and the environment converge to dysregulate N-glycosylation in multiple sclerosis. *Nat Commun* **2011**, *2*, 334, doi:10.1038/ncomms1333.

34. Wang, X.; Shi, N.; Hui, M.; Jin, H.; Gao, S.; Zhou, Q.; Zhang, L.; Yan, M.; Shen, H. The Impact of beta-1,4-Galactosyltransferase V on Microglial Function. *Front Cell Neurosci* **2021**, *15*, 723308, doi:10.3389/fncel.2021.723308.
35. Sapperstein, S.K.; Walter, D.M.; Grosvenor, A.R.; Heuser, J.E.; Waters, M.G. p115 is a general vesicular transport factor related to the yeast endoplasmic reticulum to Golgi transport factor Uso1p. *Proc Natl Acad Sci U S A* **1995**, *92*, 522-526, doi:10.1073/pnas.92.2.522.
36. Lin, C.Y.; Lai, H.L.; Chen, H.M.; Siew, J.J.; Hsiao, C.T.; Chang, H.C.; Liao, K.S.; Tsai, S.C.; Wu, C.Y.; Kitajima, K.; et al. Functional roles of ST8SIA3-mediated sialylation of striatal dopamine D2 and adenosine A2A receptors. *Transl Psychiatry* **2019**, *9*, 209, doi:10.1038/s41398-019-0529-z.
37. Herring, B.E.; Shi, Y.; Suh, Y.H.; Zheng, C.Y.; Blankenship, S.M.; Roche, K.W.; Nicoll, R.A. Cornichon proteins determine the subunit composition of synaptic AMPA receptors. *Neuron* **2013**, *77*, 1083-1096, doi:10.1016/j.neuron.2013.01.017.
38. Sannerud, R.; Declerck, I.; Peric, A.; Raemaekers, T.; Menendez, G.; Zhou, L.; Veerle, B.; Coen, K.; Munck, S.; De Strooper, B.; et al. ADP ribosylation factor 6 (ARF6) controls amyloid precursor protein (APP) processing by mediating the endosomal sorting of BACE1. *Proc Natl Acad Sci U S A* **2011**, *108*, E559-568, doi:10.1073/pnas.1100745108.
39. Ziemcik, M.A.; Bender, T.P.; Larner, J.M.; Brautigan, D.L. Functions of protein phosphatase-6 in NF-kappaB signaling and in lymphocytes. *Biochem Soc Trans* **2017**, *45*, 693-701, doi:10.1042/BST20160169.
40. Noel, J.; Ralph, G.S.; Pickard, L.; Williams, J.; Molnar, E.; Uney, J.B.; Collingridge, G.L.; Henley, J.M. Surface expression of AMPA receptors in hippocampal neurons is regulated by an NSF-dependent mechanism. *Neuron* **1999**, *23*, 365-376, doi:10.1016/s0896-6273(00)80786-2.
41. Efimova, N.; Korobova, F.; Stankewich, M.C.; Moberly, A.H.; Stolz, D.B.; Wang, J.; Kashina, A.; Ma, M.; Svitkina, T. betaIII Spectrin Is Necessary for Formation of the Constricted Neck of Dendritic Spines and Regulation of Synaptic Activity in Neurons. *J Neurosci* **2017**, *37*, 6442-6459, doi:10.1523/JNEUROSCI.3520-16.2017.
42. Gao, Z.H.; Seeling, J.M.; Hill, V.; Yochum, A.; Virshup, D.M. Casein kinase I phosphorylates and destabilizes the beta-catenin degradation complex. *Proc Natl Acad Sci U S A* **2002**, *99*, 1182-1187, doi:10.1073/pnas.032468199.
43. Bettencourt, C.; Foti, S.C.; Miki, Y.; Botia, J.; Chatterjee, A.; Warner, T.T.; Revesz, T.; Lashley, T.; Balazs, R.; Vire, E.; et al. White matter DNA methylation profiling reveals deregulation of HIP1, LMAN2, MOBP, and other loci in multiple system atrophy. *Acta Neuropathol* **2020**, *139*, 135-156, doi:10.1007/s00401-019-02074-0.
44. Mendoza-Ferreira, N.; Karakaya, M.; Cengiz, N.; Beijer, D.; Brigatti, K.W.; Gonzaga-Jauregui, C.; Fuhrmann, N.; Holker, I.; Thelen, M.P.; Zetzsche, S.; et al. De Novo and Inherited Variants in GBF1 are Associated with Axonal Neuropathy Caused by Golgi Fragmentation. *Am J Hum Genet* **2020**, *107*, 763-777, doi:10.1016/j.ajhg.2020.08.018.
45. Lu, X.; Zhang, D.; Shoji, H.; Duan, C.; Zhang, G.; Isaji, T.; Wang, Y.; Fukuda, T.; Gu, J. Deficiency of alpha1,6-fucosyltransferase promotes neuroinflammation by increasing the sensitivity of glial cells to inflammatory mediators. *Biochim Biophys Acta Gen Subj* **2019**, *1863*, 598-608, doi:10.1016/j.bbagen.2018.12.008.
46. Rehfeld, A.; Plass, M.; Krogh, A.; Friis-Hansen, L. Alterations in polyadenylation and its implications for endocrine disease. *Front Endocrinol (Lausanne)* **2013**, *4*, 53, doi:10.3389/fendo.2013.00053.
47. Alcott, C.E.; Yalamanchili, H.K.; Ji, P.; van der Heijden, M.E.; Saltzman, A.; Elrod, N.; Lin, A.; Leng, M.; Bhatt, B.; Hao, S.; et al. Partial loss of CFIm25 causes learning deficits and aberrant neuronal alternative polyadenylation. *Elife* **2020**, *9*, doi:10.7554/eLife.50895.
48. Gebhardt, A.; Habjan, M.; Benda, C.; Meiler, A.; Haas, D.A.; Hein, M.Y.; Mann, A.; Mann, M.; Habermann, B.; Pichlmair, A. mRNA export through an additional cap-binding complex consisting of NCBP1 and NCBP3. *Nat Commun* **2015**, *6*, 8192, doi:10.1038/ncomms9192.

49. Schonemann, L.; Kuhn, U.; Martin, G.; Schafer, P.; Gruber, A.R.; Keller, W.; Zavolan, M.; Wahle, E. Reconstitution of CPSF active in polyadenylation: recognition of the polyadenylation signal by WDR33. *Genes Dev* **2014**, *28*, 2381-2393, doi:10.1101/gad.250985.114.
50. Cappell, K.M.; Larson, B.; Sciaky, N.; Whitehurst, A.W. Symplekin specifies mitotic fidelity by supporting microtubule dynamics. *Mol Cell Biol* **2010**, *30*, 5135-5144, doi:10.1128/MCB.00758-10.
51. Rosenthal, S.B.; Wang, H.; Shi, D.; Liu, C.; Abagyan, R.; McEvoy, L.K.; Chen, C.H. Mapping the gene network landscape of Alzheimer's disease through integrating genomics and transcriptomics. *PLoS Comput Biol* **2022**, *18*, e1009903, doi:10.1371/journal.pcbi.1009903.
52. Bos, C.L.; Kodach, L.L.; van den Brink, G.R.; Diks, S.H.; van Santen, M.M.; Richel, D.J.; Peppelenbosch, M.P.; Hardwick, J.C. Effect of aspirin on the Wnt/beta-catenin pathway is mediated via protein phosphatase 2A. *Oncogene* **2006**, *25*, 6447-6456, doi:10.1038/sj.onc.1209658.
53. Sun, L.; Liu, S.Y.; Zhou, X.W.; Wang, X.C.; Liu, R.; Wang, Q.; Wang, J.Z. Inhibition of protein phosphatase 2A- and protein phosphatase 1-induced tau hyperphosphorylation and impairment of spatial memory retention in rats. *Neuroscience* **2003**, *118*, 1175-1182, doi:10.1016/s0306-4522(02)00697-8.
54. Guo, X.; Waddell, D.S.; Wang, W.; Wang, Z.; Liberati, N.T.; Yong, S.; Liu, X.; Wang, X.F. Ligand-dependent ubiquitination of Smad3 is regulated by casein kinase 1 gamma 2, an inhibitor of TGF-beta signaling. *Oncogene* **2008**, *27*, 7235-7247, doi:10.1038/onc.2008.337.
55. Jia, L.; Pina-Crespo, J.; Li, Y. Restoring Wnt/beta-catenin signaling is a promising therapeutic strategy for Alzheimer's disease. *Mol Brain* **2019**, *12*, 104, doi:10.1186/s13041-019-0525-5.
56. Wang, M.; Liu, X.; Hou, Y.; Zhang, H.; Kang, J.; Wang, F.; Zhao, Y.; Chen, J.; Liu, X.; Wang, Y.; et al. Decrease of GSK-3beta Activity in the Anterior Cingulate Cortex of Shank3b (-/-) Mice Contributes to Synaptic and Social Deficiency. *Front Cell Neurosci* **2019**, *13*, 447, doi:10.3389/fncel.2019.00447.
57. Mardones, M.D.; Andaur, G.A.; Varas-Godoy, M.; Henriquez, J.F.; Salech, F.; Behrens, M.I.; Couve, A.; Inestrosa, N.C.; Varela-Nallar, L. Frizzled-1 receptor regulates adult hippocampal neurogenesis. *Mol Brain* **2016**, *9*, 29, doi:10.1186/s13041-016-0209-3.
58. Goldberg, J.; Currais, A.; Prior, M.; Fischer, W.; Chiruta, C.; Ratliff, E.; Daugherty, D.; Dargusch, R.; Finley, K.; Esparza-Molto, P.B.; et al. The mitochondrial ATP synthase is a shared drug target for aging and dementia. *Aging Cell* **2018**, *17*, doi:10.1111/accel.12715.
59. Ferre, C.A.; Thouard, A.; Betourne, A.; Le Dorze, A.L.; Belenguer, P.; Miquel, M.C.; Peyrin, J.M.; Gonzalez-Dunia, D.; Szelechowski, M. HSPA9/Mortalin mediates axo-protection and modulates mitochondrial dynamics in neurons. *Sci Rep* **2021**, *11*, 17705, doi:10.1038/s41598-021-97162-1.
60. Silva, P.N.; Furuya, T.K.; Braga, I.L.; Rasmussen, L.T.; Labio, R.W.; Bertolucci, P.H.; Chen, E.S.; Turecki, G.; Mechawar, N.; Payao, S.L.; et al. Analysis of HSPA8 and HSPA9 mRNA expression and promoter methylation in the brain and blood of Alzheimer's disease patients. *J Alzheimers Dis* **2014**, *38*, 165-170, doi:10.3233/JAD-130428.
61. Jian, F.; Chen, D.; Chen, L.; Yan, C.; Lu, B.; Zhu, Y.; Chen, S.; Shi, A.; Chan, D.C.; Song, Z. Sam50 Regulates PINK1-Parkin-Mediated Mitophagy by Controlling PINK1 Stability and Mitochondrial Morphology. *Cell Rep* **2018**, *23*, 2989-3005, doi:10.1016/j.celrep.2018.05.015.
